# Supplementary material
Source: publisher figshare collection journal article supplement (https://gsajournals.figshare.com/articles/dataset/_/11782317)

number of genes

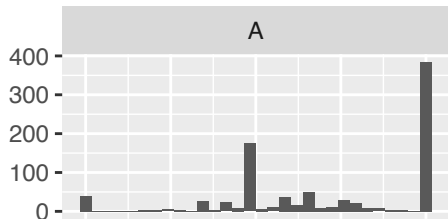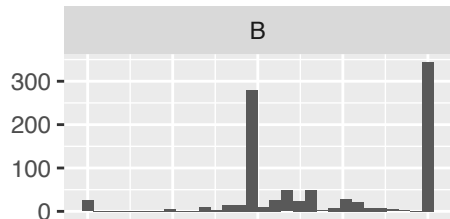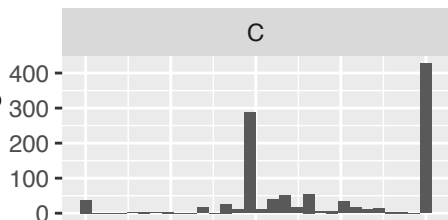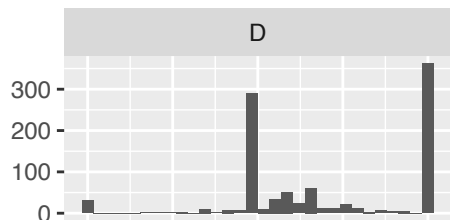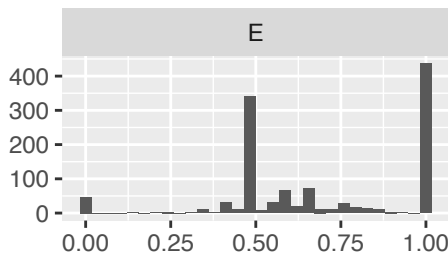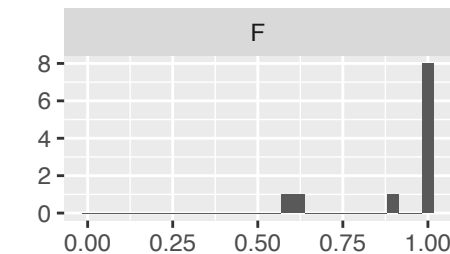

relative male heterozygosity

Supplement: Supplementary file 1 [file 1]
